# Supplementary material for: Estimation of heritability and genetic correlation of body weight gain and growth curve parameters in Korean native chicken
Source: PubMed Central journal article supplement — Asian-Australas J Anim Sci. 2017 Jun 27;31(1):26–31. doi: 10.5713/ajas.17.0179 (PMC5756919; doi:10.5713/ajas.17.0179), 2017-06-27
Supplement: ajas-31-1-26-supplementary.pdf [file ajas-31-1-26-supplementary.pdf]

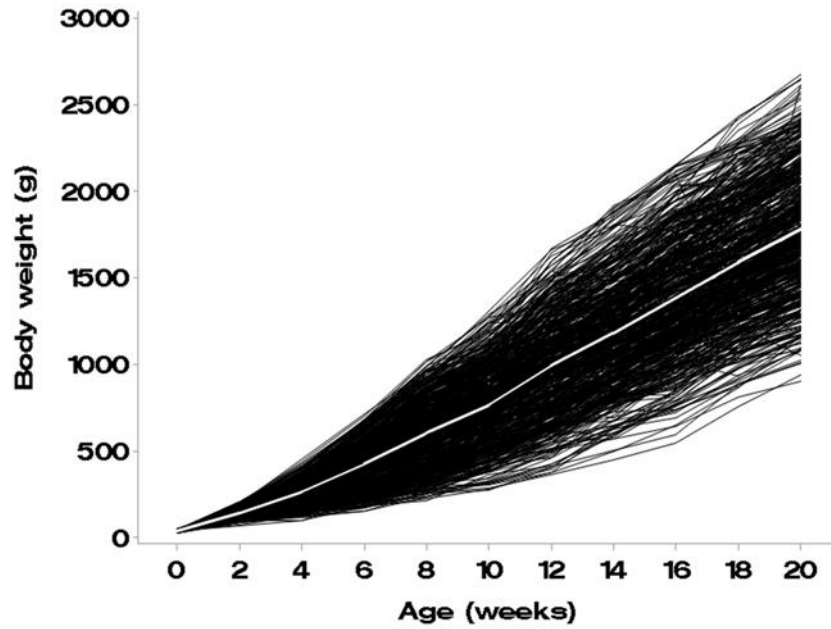

**Supplementary Figure S1.** Growth trajectories of the KNC from hatch to 20 weeks of ages (including both sex), each black lines represent the individual growth of male and female in the population and where white line indicates the average growth in the population.
